# Supplementary material
Source: MDPI journal article supplement (https://www.mdpi.com/2075-163X/13/12/1473)
Supplement: s1 [file s1 › Figure S1.pdf]

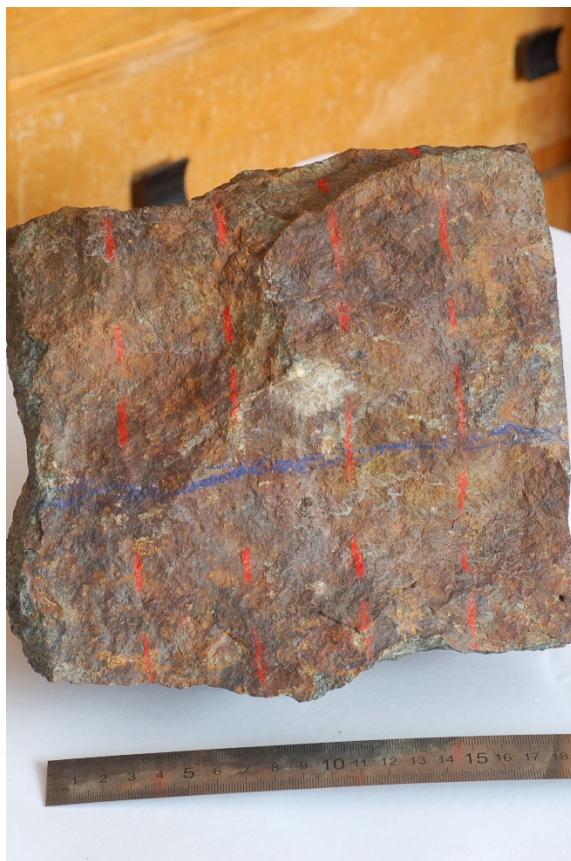

(A)

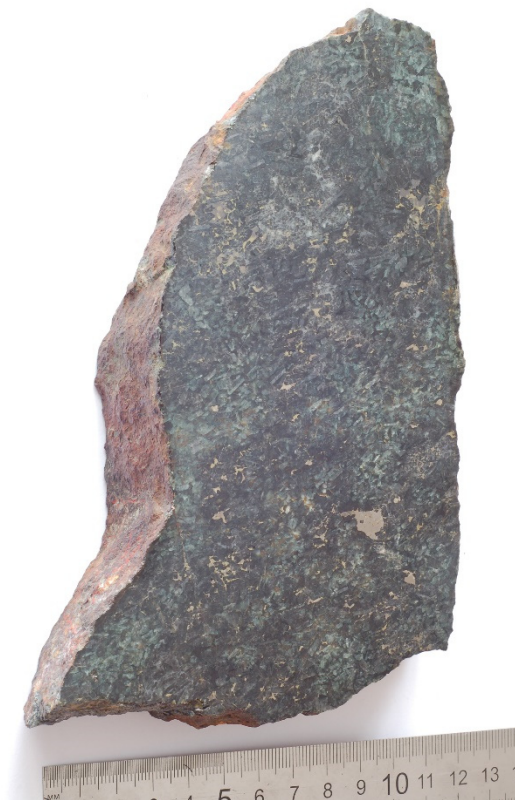

(B)

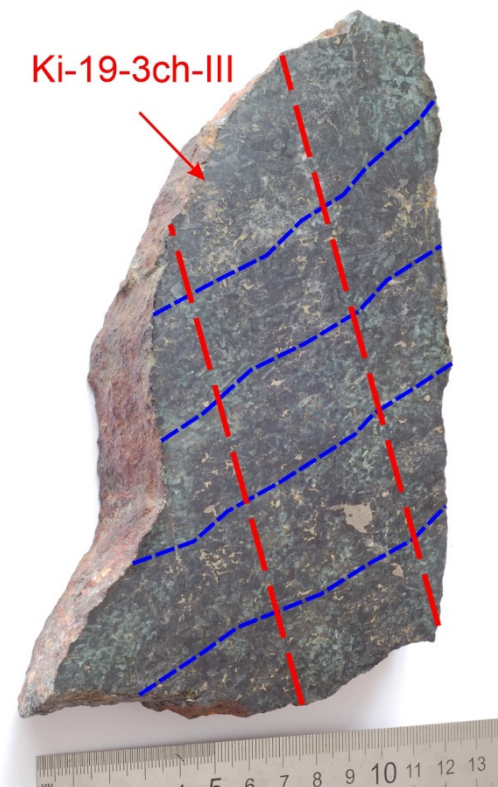

(C)

**Figure S1.** Photographs of a mineralized anorthosite ore block from the Kievev deposit. (A) Sample Ki-19-3ch that was cut along red lines into five pieces at right angles to the plane-parallel orientation of the plagioclase. The latter is indicated by blue line. (B, C) Photograph of a polished slab of mineralized anorthosite that was cut to produce the 30×45×150 mm sample Ki-19-3ch-III. Dashed blue lines in image (C) also indicate the direction of the plagioclase plane-parallel orientation.
