# Supplementary material
Source: MDPI journal article supplement (https://www.mdpi.com/2075-163X/13/12/1473)
Supplement: s1 [file s1 › Table S1.xlsx]

## Sheet: Table S1
Table S1. Сomposition of apatite from rocks of the Kievey PGE deposit (EDS1).
Oxide concentrations (wt. %)
Sample	66075P-1	66075P-1	66075P-1	66075P-1	66075P-1	66075P-1	66075P-1	66075P-1	66075P-1	66075P-1	66075P-1	66075P-1	66075P-1	66075P-1	66075P-1	66075P-1	66075P-1	66075P-1	66075P-1	66075P-1	66075P-1	66075P-1	66075P-1	66075P-1	66075P-1	66075P-1	66075P-1	66075P-1	66075P-1	66075P-1	66075P-1	66075P-1	66075P-1	66075P-1	66075P-1	66075P-1	66075P-1	66075P-1	66075P-1	66075P-1	66075P-1	66075P-1	66075P-1	66075P-1	66075P-1	66075P-1	66075P-1	66075P-1	66075-2
Rock type	MAN	MAN	MAN	MAN	MAN	MAN	MAN	MAN	MAN	MAN	MAN	MAN	MAN	MAN	MAN	MAN	MAN	MAN	MAN	MAN	MAN	MAN	MAN	MAN	MAN	MAN	MAN	MAN	MAN	MAN	MAN	MAN	MAN	MAN	MAN	MAN	MAN	MAN	MAN	MAN	MAN	MAN	MAN	MAN	MAN	MAN	MAN	MAN	MAN
Apatite type	SSI	SSI	IF	IF	IF	IF	IF	SSI	SSI	IF	IF	IF	IF	SSI	SSI	SSI	SSI	IF	IF	IF	IF	IF	SSI	IF	IF	SSI	SSI	SSI	SSI	IF	IF	IF	IF	IF	IF	IF	IF	IF	IF	IF	SSI	SSI	SSI	SSI	SSI	SSI	IF	IF	IF
Reference	This study	This study	This study	This study	This study	This study	This study	This study	This study	This study	This study	This study	This study	This study	This study	This study	This study	This study	This study	This study	This study	This study	This study	This study	This study	This study	This study	This study	This study	This study	This study	This study	This study	This study	This study	This study	This study	This study	This study	This study	This study	This study	This study	This study	This study	This study	This study	This study	This study
Spot numbers	1a1	1a2	1b1	1b2	1c-2-1	1c-2-2	1c-2-3	1d1	1d2	2a1	2a2	2b1	2b2	3a	3b	3c1	3c2	3d	4a1	4a2	4b1	4b2	4c	4d1	4d2	4 e 1	4 e 2	4f1	4f2	4g	5a1	5a-1-3	5a-1-4	5b1	5b2	5c1	5c2	5d	5 e 1	5 e 2	6a1	6a2	6b1	6b2	6c1	6c2	6d1	6d2	8-1a
CaO	54.31	54.93	54.35	54.95	55.04	55.27	54.49	54.74	55.19	54.99	55.57	55.17	55.53	54.86	55.09	55.28	55.52	55.06	51	55	54.56	55.26	55.24	54.83	55.23	54.62	54.64	54.61	54.76	55.3	54.62	54.69	55.63	54.67	54.29	55.03	55.26	54.32	54.48	54.81	54.54	55.15	54.56	55.01	54.75	55.31	55.16	54.86	55.81
SrO	bdl	bdl	bdl	bdl	bdl	bdl	bdl	bdl	bdl	bdl	bdl	bdl	bdl	bdl	bdl	bdl	bdl	bdl	bdl	bdl	bdl	bdl	bdl	bdl	bdl	bdl	bdl	bdl	bdl	bdl	bdl	bdl	bdl	bdl	bdl	bdl	bdl	bdl	bdl	bdl	bdl	bdl	bdl	bdl	bdl	bdl	bdl	bdl	bdl
MnO	bdl	bdl	bdl	bdl	bdl	bdl	bdl	bdl	bdl	bdl	bdl	bdl	bdl	bdl	bdl	bdl	bdl	bdl	bdl	bdl	bdl	bdl	bdl	bdl	bdl	bdl	bdl	bdl	bdl	bdl	bdl	bdl	bdl	bdl	bdl	bdl	bdl	bdl	bdl	bdl	bdl	bdl	bdl	bdl	bdl	bdl	bdl	bdl	bdl
FeO	0.08	0.15	0.06	bdl	0.02	0.04	0.06	0.07	0.09	bdl	bdl	0.07	0.03	0.1	0.07	bdl	0.04	0.13	bdl	0.05	0.08	0.06	0.07	0.1	0.07	0.1	0.07	0.1	0.05	0.03	0.1	0.08	0.06	0.11	0.36	0.1	0.08	0.13	bdl	0.06	0.07	0.09	0.1	0.03	bdl	bdl	0.08	0.13	bdl
La2O3	bdl	bdl	0.12	bdl	bdl	bdl	bdl	bdl	bdl	0.17	bdl	bdl	bdl	bdl	bdl	bdl	bdl	0.12	bdl	bdl	0.09	bdl	bdl	bdl	bdl	0.15	bdl	0.12	bdl	bdl	bdl	0.11	bdl	0.19	bdl	0.1	bdl	bdl	bdl	bdl	0.08	bdl	0.18	bdl	bdl	bdl	0.18	bdl	bdl
Ce2O3	0.3	bdl	0.39	0.2	0.14	0.09	0.14	0.27	bdl	0.31	0.16	0.2	0.18	0.11	0.16	0.16	0.09	0.25	0.17	0.2	0.28	bdl	0.12	0.23	0.18	0.31	0.15	0.39	0.18	0.12	0.36	0.39	bdl	0.48	0.14	0.32	0.22	0.22	0.24	0.13	0.3	bdl	0.38	bdl	0.23	bdl	0.31	0.24	0.15
Nd2O3	bdl	bdl	bdl	bdl	bdl	bdl	bdl	bdl	bdl	0.16	bdl	bdl	bdl	bdl	bdl	bdl	bdl	bdl	bdl	bdl	bdl	bdl	bdl	bdl	bdl	0.15	0.07	bdl	0.08	bdl	bdl	0.39	bdl	0.14	bdl	bdl	bdl	bdl	bdl	bdl	0.13	bdl	0.06	bdl	bdl	bdl	0.15	0.16	bdl
P2O5	41.3	41.72	41.26	41.88	41.83	41.91	41.33	41.44	41.66	41.73	42.37	41.97	42.28	41.78	41.88	41.99	42.2	42.09	40.3	41.8	41.54	42.19	42.11	41.74	42.04	41.71	41.57	41.69	41.64	41.92	41.58	41.38	42.35	41.56	41.47	41.87	42.16	41.36	41.65	41.62	41.64	41.95	41.59	41.72	41.65	42.09	42.16	41.83	42.57
SiO2	0.26	0.1	0.38	0.25	0.21	0.19	0.21	0.33	0.28	0.32	0.27	0.3	0.25	0.22	0.21	0.24	0.24	0.25	0.24	0.26	0.24	0.14	0.21	0.26	0.22	0.27	0.23	0.28	0.27	0.23	0.39	0.55	0.08	0.44	0.56	0.23	0.25	0.31	0.23	0.27	0.29	0.16	0.26	0.26	0.27	0.09	0.27	0.25	0.35
F	1.32	1.54	1.53	1.58	1.36	1.31	1.17	1.38	1.37	1.57	1.66	1.27	1.36	1.36	1.44	1.52	1.63	1.41	1.78	1.51	1.25	1.39	1.52	1.09	1.38	1.38	1.44	1.34	1.48	1.64	1.53	1.62	1.76	1.27	1.4	1.33	1.45	1.35	1.26	1.44	1.42	1.46	1.46	1.55	1.33	1.45	1.65	1.52	2.21
Cl	0.12	0.11	0.03	0.08	0.15	0.14	0.14	0.13	0.12	0.09	0.07	0.15	0.14	0.12	0.11	0.16	0.16	0.17	0.11	0.1	0.22	0.17	0.13	0.46	0.34	0.22	0.21	0.16	0.13	0.16	0.29	0.17	0.13	0.27	0.09	0.16	0.25	0.19	0.13	0.11	0.15	0.15	0.16	0.05	0.18	0.17	0.12	0.11	0.14
O=Cl,F	0.58287	0.673245	0.650981	0.683317	0.606482	0.583173	0.524225	0.61039	0.603923	0.681363	0.714744	0.568587	0.604225	0.599712	0.631139	0.676107	0.722423	0.632048	0.774297	0.658356	0.575963	0.623627	0.669337	0.562756	0.65778	0.6307	0.653706	0.600318	0.652495	0.726634	0.709655	0.720469	0.77039	0.595668	0.609784	0.596107	0.666944	0.611298	0.559863	0.631139	0.631745	0.648587	0.650844	0.663915	0.600621	0.64889	0.721817	0.664824	0.96212
Total	97.1071	97.8768	97.469	98.2567	98.1435	0.583173	97.0158	97.7496	98.1061	98.6586	99.3853	98.5614	99.1658	97.9503	98.3289	98.6739	99.1576	98.848	92.8257	98.2616	97.684	98.5864	98.7307	98.1472	98.8022	98.2793	97.7263	98.0897	97.9375	98.6734	98.1603	98.6595	99.2396	98.5343	97.7002	98.5439	99.0031	97.2687	97.4301	97.8089	97.9883	98.3114	98.0992	97.9561	97.8094	98.4611	99.3582	98.4352	100.268
Formula coefficients are calculated for 25 charges
Ca	4.89661	4.90409	4.88203	4.88366	4.90449	4.91591	4.91841	4.90317	4.92071	4.88404	4.87927	4.89821	4.8967	4.89672	4.89901	4.89618	4.88929	4.87492	4.7624	4.8929	4.89448	4.89548	4.8874	4.89762	4.89134	4.87256	4.89087	4.87817	4.88993	4.89646	4.86849	4.8656	4.89053	4.87497	4.85604	4.89396	4.88073	4.88625	4.88966	4.89868	4.87419	4.90087	4.87551	4.9024	4.89693	4.90683	4.8601	4.87746	4.84432
Sr	0	0	0	0	0	0	0	0	0	0	0	0	0	0	0	0	0	0	0	0	0	0	0	0	0	0	0	0	0	0	0	0	0	0	0	0	0	0	0	0	0	0	0	0	0	0	0	0	0
Mn	0	0	0	0	0	0	0	0	0	0	0	0	0	0	0	0	0	0	0	0	0	0	0	0	0	0	0	0	0	0	0	0	0	0	0	0	0	0	0	0	0	0	0	0	0	0	0	0	0
Fe	0.00562972	0.0104525	0.00420662	0	0.001391	0.00277687	0.00422708	0.00489386	0.00626312	0	0	0.00485081	0.0020648	0.00696675	0.00485864	0	0.0027494	0.00898372	0	0.0034718	0.00560148	0.00414874	0.00483396	0.00697185	0.00483873	0.00696284	0.00489052	0.00697214	0.0034849	0.00207329	0.00695703	0.0055552	0.00411699	0.00765591	0.0251331	0.00694132	0.005515	0.00912725	0	0.00418554	0.00488277	0.0062424	0.00697473	0.00208675	0	0	0.00550163	0.00902115	0
La	0	0	0.0037107	0	0	0	0	0	0	0.00519778	0	0	0	0	0	0	0	0.00365752	0	0	0.00277938	0	0	0	0	0.00460649	0	0.00369011	0	0	0	0.00336895	0	0.00583244	0	0.0030615	0	0	0	0	0.00246122	0	0.00553723	0	0	0	0.00545967	0	0
Ce	0.00924236	0	0.0119705	0.00607372	0.00426275	0.00273529	0.004318	0.00826385	0	0.00940813	0.00480044	0.00606752	0.00542369	0.00335497	0.00486186	0.00484235	0.00270823	0.00756342	0.00542439	0.00607968	0.00858295	0	0.00362787	0.00702007	0.00544718	0.0094496	0.00458789	0.0119041	0.00549236	0.00363065	0.0109646	0.011856	0	0.0146255	0.00427894	0.00972428	0.00663962	0.00676215	0.00736036	0.00397017	0.00916125	0	0.0116032	0	0.00702933	0	0.00933316	0.00729114	0.00444896
Nd	0	0	0	0	0	0	0	0	0	0.0047369	0	0	0	0	0	0	0	0	0	0	0	0	0	0	0	0.00446042	0.00208859	0	0.00238127	0	0	0.0115657	0	0.00416131	0	0	0	0	0	0	0.00387266	0	0.00178721	0	0	0	0.00440545	0.00474172	0
P	2.94238	2.94325	2.92862	2.94116	2.94535	2.94554	2.94786	2.93309	2.93508	2.92871	2.93972	2.94447	2.94608	2.9468	2.9429	2.93879	2.93658	2.94472	2.97368	2.93842	2.94464	2.95343	2.94403	2.94613	2.94204	2.94021	2.94028	2.94273	2.93821	2.933	2.9286	2.90906	2.94194	2.92841	2.93109	2.94237	2.94244	2.93988	2.95386	2.93937	2.94057	2.94573	2.93676	2.93795	2.94366	2.9506	2.93531	2.93872	2.91983
Si	0.021881	0.00833349	0.0318613	0.0207394	0.0174668	0.0157742	0.0176932	0.0275908	0.0233025	0.0265291	0.0221287	0.0248619	0.0205776	0.0183295	0.0174314	0.0198417	0.0197281	0.0206609	0.0209192	0.0215901	0.0200965	0.0115768	0.0173429	0.021678	0.0181867	0.0224826	0.0192168	0.0233465	0.0225051	0.0190092	0.0324478	0.045674	0.0065647	0.036623	0.046755	0.0190927	0.0206107	0.0260289	0.0192685	0.0225248	0.0241915	0.0132717	0.0216869	0.0216281	0.0225414	0.00745278	0.0222056	0.020747	0.0283574
F	0.351272	0.405811	0.405646	0.414467	0.357692	0.343906	0.311708	0.364843	0.360531	0.411575	0.430207	0.332807	0.353972	0.358297	0.377966	0.397363	0.423681	0.368473	0.490603	0.396493	0.330976	0.363457	0.396937	0.287374	0.360733	0.363362	0.380445	0.3533	0.390082	0.428603	0.402521	0.425401	0.456682	0.334258	0.369611	0.349114	0.378004	0.358429	0.333785	0.379871	0.374567	0.382944	0.385082	0.407712	0.351112	0.379682	0.4291	0.398874	0.566197
Cl	0.0171154	0.0155358	0.00426299	0.0112476	0.0211446	0.0196986	0.0199907	0.0184208	0.0169255	0.0126453	0.00972309	0.0210677	0.0195297	0.0169442	0.0154746	0.0224182	0.0222899	0.0238107	0.0162495	0.0140733	0.031221	0.0238246	0.0181953	0.0650005	0.0476347	0.031047	0.0297363	0.0226098	0.0183643	0.0224114	0.0408914	0.023926	0.0180793	0.0380872	0.0127349	0.0225099	0.0349306	0.0270371	0.0184577	0.0155526	0.0212066	0.0210868	0.0226182	0.00704902	0.0254685	0.0238582	0.0167261	0.0154711	0.0192239
OH	0.631612	0.578653	0.590091	0.574286	0.621164	0.636395	0.668301	0.616736	0.622544	0.575779	0.56007	0.646125	0.626498	0.624759	0.606559	0.580219	0.55403	0.607717	0.493147	0.589434	0.637803	0.612718	0.584867	0.647625	0.591632	0.605591	0.589818	0.62409	0.591554	0.548985	0.556588	0.550673	0.525239	0.627655	0.617654	0.628376	0.587065	0.614533	0.647758	0.604577	0.604226	0.595969	0.5923	0.585239	0.623419	0.59646	0.554174	0.585655	0.414579
1EDS, energy dispersive X-ray spectrometry excepting spots from [62] made using WDS (Cameca MS-46).
Abbreviations. Rock type: AN, anorthosite; GN, gabbronorite; MAN, mineralized anorthosite; OPX, orthopyroxenite.
Apatite type: IF, inclusions free apatite; SSI, apatite with sulfide-silicate inclusions.
Bdl, below detection limit; nd, no data.
References
62. Latypov, R.M. Lower Layered Horizon of the Pana Tundra intrusion: structure, ore potential, petrogenesis. Ph.D. Thesis, IGGP RAS, St.-Petersburg, Russia, 1995; 123 p.
[truncated: 17 more columns]

## Sheet: Table S2
Table S2: Trace element concentrations in apatite from the mineralized anorthosite of the Kievey PGE deposit (LA-ICP-MS).
Element concentrations (ppm)
Spot numbers	Apatite type	Li	σ	Be	σ	B	σ	Na	σ	Mg	σ	Al	σ	Si	σ	Ca	σ	Sc	σ	Ti	σ	V	σ	Cr	σ	Mn	σ	Fe	σ	Co	σ	Ni	σ	Cu	σ	Zn	σ	Ga	σ	Ge	σ	As	σ	Se	σ	Rb	σ	Sr	σ
66075P-1_1a	IF center	bdl	0.11	bdl	0.79	3.31	1.17	183.54	6.89	153.96	8.66	367.58	12.69	2076.24	133.98	404664	12875.9	bdl	0.24	bdl	0.75	5.38	0.38	24.37	4.26	378.34	12.04	932.11	63.98	0.33	0.099	81.55	3.46	19.13	1.27	bdl	0.58	30.62	1.21	2.46	0.59	4.97	0.83	bdl	2.77	bdl	0.084	235.49	7.67
66075P-1_1b	IF edge	bdl	0.11	0.58	0.34	3.15	0.99	336.53	12.46	507.01	25.81	1378.98	46.8	10887.1	479.38	404664	12883.4	bdl	0.24	4.31	1.1	5.05	0.37	21.5	4.11	382.13	12.2	2020.57	137.41	0.27	0.1	3.24	0.82	bdl	0.63	bdl	0.47	37.96	1.47	5.13	0.63	5.53	0.77	6.28	2.59	7.34	0.39	246.76	8.06
66075P-1_2b	SSI	bdl	0.11	0.44	0.26	bdl	0.96	215.95	8.19	35.32	2.79	bdl	0.34	1394.9	99.99	409166	13005	0.44	0.18	1.64	0.59	5.23	0.37	9.42	3.37	387.6	12.35	316.92	30.95	bdl	0.057	0.94	0.29	bdl	5.78	bdl	0.46	28.83	1.12	2.91	0.49	5.78	0.68	7.15	2.35	bdl	0.086	201.19	6.61
66075P-1_3	SSI	bdl	0.071	0.26	0.19	1.97	0.74	305.49	11.6	144.95	8.37	bdl	0.21	1397.76	91.1	406879	12925.3	bdl	0.16	0.73	0.37	5.84	0.4	19.1	2.78	384.42	12.25	781.01	60.45	bdl	0.06	0.46	0.19	bdl	1.43	0.75	0.33	35.94	1.32	4.54	0.45	6.86	0.67	5.71	2.24	bdl	0.086	256.95	8.45
66075P-1_4a	IF center	bdl	0.084	bdl	0.39	bdl	0.96	253.44	9.83	173.43	10.25	bdl	0.21	1367.49	100.03	406522	12926.9	bdl	0.16	bdl	0.72	5.84	0.42	15.88	3.22	368.32	11.81	681.31	55.72	0.198	0.063	0.41	0.15	bdl	0.98	1.11	0.46	28.9	1.14	3.59	0.45	5.26	0.68	7.35	2.35	bdl	0.085	249.25	8.27
66075P-1_5a	IF edge	bdl	0.12	bdl	0.47	bdl	0.68	302.05	12.08	146.37	9.56	17.48	1.11	1576.45	111.86	406951	12965.7	bdl	0.19	bdl	1.01	5.56	0.46	15.66	3.29	425.65	13.76	846.03	75.09	0.156	0.077	10.9	1.04	1.75	0.71	1.59	0.56	49.2	1.86	4.2	0.53	6.41	0.85	6.29	2.63	bdl	0.077	235.83	7.98
66075P-1_5b	IF edge	bdl	0.057	bdl	0.4	bdl	0.71	298.32	12.05	192.37	11.99	bdl	0.31	1332.44	95.45	406951	12936.7	0.69	0.17	bdl	0.9	5.81	0.46	17.06	2.88	416.16	13.41	853.14	77.54	0.125	0.047	<ПО	0.32	1.03	0.45	bdl	0.41	33.94	1.29	3.35	0.45	7.15	0.73	8.58	2.37	bdl	0.087	243.33	8.24
66075P-1_5c	IF center	0.36	0.11	bdl	0.6	2.88	0.87	125.9	5.34	122.73	8.46	433.65	15.14	3408.37	175.36	410953	13082.6	0.46	0.16	1.07	0.54	8.56	0.67	16.89	2.92	467.32	15.15	1349.23	126.96	bdl	0.067	1.29	0.33	bdl	0.53	bdl	0.47	33.18	1.33	3.18	0.49	7.1	0.83	5.6	2.08	1.07	0.14	241.95	8.3
66075P-1_6	SSI	bdl	0.05	bdl	0.44	bdl	1.09	393.38	16.7	89.55	7.77	0.34	0.22	1221.41	103.69	410953	13188.9	bdl	0.18	bdl	0.77	5.45	0.56	12.39	2.97	428.33	14.25	567.02	61.91	bdl	0.061	0.99	0.4	bdl	0.54	3.17	0.81	34.32	1.68	3.95	0.65	5.29	0.94	5.19	2.53	bdl	0.071	224.83	7.98
66075P-1_6-2	SSI	bdl	0.098	bdl	0.24	bdl	0.69	426.92	18.35	71.63	6.5	0.94	0.34	1182.51	99.31	410953	13170.3	bdl	0.18	0.54	0.54	5	0.52	5.24	2.71	450.15	14.95	538.81	60.65	bdl	0.075	1.63	0.54	bdl	0.53	bdl	0.54	33.25	1.6	3.71	0.59	5.46	0.91	12.48	3.19	0.125	0.076	224.58	8
Concentrations are based on time-resolved signals calibrated with NIST 610 and NIST 612 glass.
Abbreviations. Apatite type: IF, inclusions free apatite; SSI, apatite with sulfide-silicate inclusions.
Bdl, below detection limit.
[truncated: 88 more columns]

## Sheet: Table S3
Table S3: Minimum detection limits (ppm, 99% confidence) for LA-ICP-MS spots.
Spot numbers	Li	Be	B	Na	Mg	Al	Si	Ca	Sc	Ti	V	Cr	Mn	Fe	Co	Ni	Cu	Zn	Ga	Ge	As	Se	Rb	Sr	Y	Zr	Nb	Mo	Ag	Cd	In	Sn	Sb	Cs	Ba	La	Ce	Pr	Nd	Sm	Eu	Gd	Tb	Dy	Ho	Er	Tm	Yb	Lu
66075P-1_1a	0.22	2.01	2.29	2.93	0.84	1.1	238.82	339.46	0.622	1.41	0.157	10.48	0.671	16.43	0.187	0.701	1.31	1.41	0.246	1.37	1.64	6.71	0.19	0.765	0.597	0.347	0.174	0.208	0.229	0.19	0.0784	0.281	0.24	0.0522	1.02	0.308	0.42	0.122	0.866	0.483	0.0498	0.306	0.0516	0.197	0.0426	0.2	0.028	0.125	0.0218
66075P-1_1b	0.227	0.01	1.57	2.43	2.46	1.96	239.96	419.57	0.549	0.01	0.127	10.1	0.776	18.48	0.213	1.73	1.51	1.13	0.115	1.18	1.26	5.77	0.218	0.445	0.994	0.208	0.148	0.308	0.294	0.23	0.0427	0.23	0.153	0.0512	0.355	0.485	0.683	0.222	1.44	0.61	0.0519	0.536	0.0932	0.42	0.0967	0.373	0.0684	0.159	0.0454
66075P-1_2b	0.255	0.01	2.24	2.14	1.78	0.873	196.41	332.78	0.423	0.01	0.01	8.83	0.547	46.72	0.151	0.49	14.47	1.11	0.264	1.06	1.01	5.36	0.228	0.287	0.617	0.235	0.0685	0.351	0.01	0.153	0.01	0.25	0.202	0.0501	0.134	0.248	0.364	0.144	0.848	0.399	0.01	0.381	0.0731	0.374	0.0582	0.193	0.01	0.148	0.0468
66075P-1_3	0.143	0.01	1.44	1.81	0.771	0.532	166.78	316.69	0.438	0.01	0.0943	6.87	0.58	17.52	0.166	0.341	3.93	0.747	0.258	0.777	0.656	5.38	0.23	0.299	0.781	0.01	0.116	0.281	0.155	0.01	0.0223	0.182	0.181	0.0364	0.13	0.371	0.538	0.194	1.07	0.372	0.0272	0.407	0.0487	0.34	0.0804	0.279	0.0373	0.204	0.0204
66075P-1_4a	0.224	1.24	2.02	2.02	0.7	0.556	189.53	276.17	0.377	1.7	0.106	7.88	0.517	14.5	0.0967	0.01	2.69	1.01	0.194	0.776	0.968	5.06	0.195	0.219	0.474	0.01	0.106	0.182	0.143	0.169	0.05	0.267	0.148	0.0469	0.119	0.222	0.337	0.0992	0.667	0.24	0.01	0.274	0.0559	0.209	0.0318	0.189	0.0241	0.201	0.0263
66075P-1_5a	0.221	0.876	1.33	2.08	1.38	1.61	188.22	373.56	0.419	2.67	0.172	7.52	0.732	15.67	0.138	0.71	1.5	1.09	0.169	0.812	1.08	5.43	0.161	0.36	0.643	0.119	0.0607	0.365	0.143	0.139	0.0407	0.227	0.105	0.0531	0.01	0.193	0.268	0.111	0.625	0.302	0.0248	0.371	0.0557	0.278	0.0608	0.306	0.034	0.214	0.0261
66075P-1_5b	0.119	0.829	1.63	2.03	1.12	0.784	175.92	377.39	0.342	2.51	0.216	6.81	0.794	15.12	0.0658	0.675	1.01	0.946	0.333	0.832	0.536	5.01	0.209	0.423	1.06	0.195	0.115	0.423	0.215	0.0935	0.0384	0.196	0.01	0.034	0.01	0.574	0.774	0.297	1.51	0.768	0.0235	0.602	0.099	0.5	0.12	0.315	0.0578	0.319	0.0602
66075P-1_5c	0.114	1.78	0.99	1.89	1.94	0.5	164.65	311.94	0.316	0.01	0.0956	6.45	0.65	14.31	0.127	0.291	1.25	0.979	0.198	0.855	0.73	4.05	0.2	0.368	0.796	0.303	0.134	0.166	0.185	0.127	0.0412	0.243	0.0957	0.0375	0.106	0.465	0.676	0.222	1.18	0.52	0.0449	0.478	0.0804	0.332	0.0777	0.302	0.0406	0.204	0.0469
66075P-1_6	0.163	1.41	1.61	1.62	0.623	0.334	138.26	218.14	0.311	1.55	0.113	5.39	0.423	14.67	0.113	0.01	1.12	0.837	0.091	0.669	0.685	3.54	0.121	0.218	0.4	0.189	0.01	0.17	0.0946	0.0925	0.01	0.224	0.17	0.0467	0.108	0.23	0.322	0.105	0.599	0.279	0.023	0.209	0.038	0.248	0.0448	0.158	0.0221	0.0695	0.01
66075P-1_6-2	0.185	0.76	0.95	1.56	0.816	0.537	133.75	189.67	0.34	0.01	0.0526	5.21	0.393	14.4	0.122	0.398	0.884	0.857	0.17	0.612	0.574	3.59	0.103	0.119	0.222	0.175	0.052	0.275	0.01	0.173	0.035	0.213	0.145	0.0307	0.01	0.131	0.166	0.0621	0.331	0.259	0.0214	0.112	0.0204	0.134	0.0223	0.01	0.0206	0.01	0.01
[truncated: 8 more columns]
